# Supplementary material for: Maternal exposure to intimate partner violence and uptake of maternal healthcare services in Ethiopia: Evidence from a national survey
Source: PLOS journal article supplement (doi:10.1371/journal.pone.0273146), 2022-08-18
Supplement: S1 (10.1371/journal.pone.0273146.s001) [file journal.pone.0273146.s001]

በኢትዮጵያ ፌዴራላዊ ዲሞክራሲያዊ ሪፐብሊክ  
በብሔራዊ የፕላን ኮሚሽን  
የማዕከላዊ ስታቲስቲክስ ኤጀንሲ

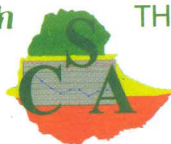

THE FEDERAL DEMOCRATIC REPUBLIC OF ETHIOPIA  
NATIONAL PLANNING COMMISSION  
CENTRAL STATISTICAL AGENCY

ቁጥር 3-15/578

Ref. NO. 08 SEP 2017

ቀን

Date

To: University of Oslo, Faculty of Medicine, Norway

Subject: Approval letter for data Access

SemanKedirOusman requested our organization to write a letter of approval in order to use the Ethiopian Demographic and Health Survey (EDHS) raw data for the year 2000, 2005, 2011, and 2016 for third degree fulfillment.

Therefore, the Central Statistical Agency of Ethiopia (CSA) will authorize to use the after mentioned raw data for his doctoral project purpose based on the raw data access policy of the organization. Accordingly, the requested data should only be used for the purpose of the registered research or study.

With regards

  
ወኪል ገብረ  
ደ/ር ገብረ  
ደ/ር ገብረ

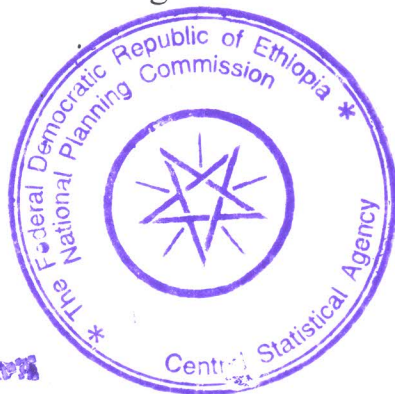

+251-1155-3011/ +251-1156-3882/ +251-1111-5131/

+251-1155-3112/ +251-1157-3296

ፋክስ ቁ.

+251-1111-5470/ +251-1155-334

Fax No.

ድረ ገጽ

Website:

[www.csa.gov.et](http://www.csa.gov.et)

✉ 1143

አዲስ አበባ - ኢትዮጵያ  
Addis Ababa - Ethiopia
